# Supplementary material for: Fine-scale spatial variability of winter CO 2 and CH 4 fluxes in Arctic tundra derived from snowpack gradient measurements
Source: Copernicus journal article supplement (doi:10.5194/egusphere-2025-5637), 2025-11-25
Supplement: Supplementary file [file egusphere-2025-5637-AC1-supplement.pdf]

## CC1: “Comment on egusphere-2025-5637” – Jeff Welker (28 Nov 2025)

Gabriel, great job on this and thanks so much for continuing to focus on winter emissions so so important.

### 5 **Response**

We thank Jeff Welker for his positive assessment of the manuscript and for underscoring the importance of winter greenhouse gas fluxes to Arctic carbon fluxes.

10 However, you have missed my program's beginning of this modern day (past ~ 3 decades) field of research which was initially criticized when I presented our initial NSF funded data from Arctic Alaska in CPH at the 1997 ITEX meeting. I showed the flux data, measurable and argued that when winter emissions (~240 days of snow cover in N AK) were added to summer net fluxes, the tundra was a net C source: "Jeff you are crazy". how can all that SOM, permafrost be present if the system is a net C source ?" came the audience challenges. My reply was today is different than the past and we now have real emission data from what makes the Arctic, the Arctic, winter. I have been delighted see Webb, Natalie, and others, including your team, join  
15 my winter emission crusade.

### **Response**

We thank Jeff Welker for drawing attention to this important omission. We agree that the pioneering winter flux measurements led by the Welker group in the late 1990s and early 2000s constitute foundational contributions to modern understanding of  
20 Arctic winter carbon exchange. We have revised the Introduction to explicitly acknowledge these earlier studies and to situate our work within this established research trajectory.

### *Revised manuscript text (Introduction)*

25 *Simulations urgently require improvement as measurements of cold season GHG fluxes in Arctic ecosystems have been shown to contribute substantially to annual carbon budgets. Field measurements from northern Alaska demonstrated that CO<sub>2</sub> emissions during the snow-covered season can be large enough to offset or exceed growing-season uptake (Fahnestock et al., 1998, 1999; Jones et al., 1999b; Welker et al., 2000), and recent syntheses reinforce these findings at pan-Arctic scales (Natali et al., 2019; Rafat et al., 2021). Relatively small CH<sub>4</sub> emissions during the lengthy cold season have also been shown to contribute >50 % of annual total sources in Alaskan tundra (Zona et al., 2016). Collectively, such studies established winter  
30 as a critical period for Arctic carbon cycling and motivated subsequent efforts to quantify cold-season fluxes across a wider range of Arctic and sub-Arctic ecosystems.*

35 *Soil-atmosphere fluxes derived from direct measurements of snowpack CO<sub>2</sub> and CH<sub>4</sub> concentrations and steady-state diffusion models have been used for several decades to estimate winter greenhouse gas fluxes in Arctic ecosystems. Manually extracting air from snowpacks with syringes allows for cost effective and spatially distributed flux measurements. However, large sample sizes (n >10) are difficult to collect within time scales where meteorological conditions are stationary and wind speeds are low, and require several samples to be extracted and analysed per microsite for flux calculations (Jones et al., 1999a;*  
40 *Mavrovic et al., 2023; Seok et al., 2009; Zhu et al., 2014). Faster, high accuracy in situ snowpack gradient measurements of CO<sub>2</sub> flux (and later CH<sub>4</sub>) were more recently made possible using portable Infrared Gas Analysers (IRGA), quantifying winter soil-atmosphere fluxes across a variety of Arctic land surface covers (Fahnestock et al., 1998; Jones et al., 1999b; Pirk et al., 2016).*

45 These are some of the absolute foundational papers that you should be including in your introduction of the "issue" and in the discussion as to how this data compare to what the Welker program discovered decades ago and continue today. Thank you for all that you and your team are doing but knowing and recognizing the origins of this research theme, is essential to educating the readers on the foundational science and how your new science continues to strengthen our understanding of 2/3 of the Arctic's calendar :)

50 The first 4 are in many ways the "beginning of the modern winter C emission studies initiated by my team/s", W Ochel's group also published a 1997 paper as well.

And, our continued contributions with packages like Natali et al. 2019

**Fahnestock, J. T., Jones, M. H., Brooks, P. D., Walker, D. A., & Welker, J. M. (1998) Winter and early spring CO<sub>2</sub> flux from tundra communities of northern Alaska. *Journal of Geophysical Research* 102(D22):29925-29931.**

55 **Fahnestock, J. T., Jones, M. H., Brooks, P. D., & Welker, J. M. (1999) Significant CO<sub>2</sub> emissions from tundra soils during winter: Implications for annual carbon budgets of arctic communities. *Global Biogeochemical Cycles* 13:775-779.**

**Jones, M. H., Fahnestock, J. T., & Welker, J. M. (1999) Early and late winter CO<sub>2</sub> efflux from Arctic tundra in the Kuparuk River watershed, Alaska. *Arctic, Antarctic and Alpine Research* 31:187-190.**

60 **Welker, J. M., Fahnestock, J. T., & Jones, M. H. (2000) Annual CO<sub>2</sub> flux from dry and moist arctic tundra: Field responses to increases in summer temperature and winter snow depth. *Climatic Change* 44:139-150.**

Schimel, J., Fahnestock, J., Michaelson, G., Mikan, C., Ping, C., Romanovsky, V., & **Welker, J. M.** (2006) Cold-season production of CO<sub>2</sub> in Arctic soils: Can laboratory and field estimates be reconciled through a simple modeling approach? *Arctic, Antarctic and Alpine Research* 38(2):249-255.

65 Sullivan, P. F., **Welker, J. M.**, Arens, S. J. T., & Sveinbjörnsson, B. (2008) Continuous estimates of CO<sub>2</sub> efflux from arctic and boreal soils during the snow-covered season in Alaska. *JGR Biogeosciences* 113:G04009.

- Nowinski, N., Taneva, L., Trumbore, S., & **Welker, J. M.** (2010) Decomposition of old organic matter as a result of deeper active layers in a snow depth manipulation experiment. *Oecologia* 163(3):785-792.
- 70 Lupascu, M., **Welker, J. M.**, Xu, X., & Czimeczik, C. I. (2014) Rates and radiocarbon content of summer ecosystem respiration in response to long-term deeper snow in the High Arctic of NW Greenland. *JGR Biogeosciences*. doi.org/10.1002/2013JG002494
- Lupascu, M., Czimeczik, C. I., Welker, M., Cooper, L., & **Welker, J. M.** (2018) Winter ecosystem respiration and sources of CO<sub>2</sub> from the High Arctic tundra of Svalbard: Response to a deeper snow experiment. *JGR Biogeosciences*. doi.org/10.1029/2018JG004396.
- 75 Ala-aho, P., **Welker, J. M.**, Bailey, H., Pedersen, S., Kopec, B., Klein, E., Mellat, M., Mustonen, K., Noor, K., & Marttila, H. (2021) Arctic snow isotope hydrology: A comparative snow-water vapor study. *Atmosphere*. doi.org/10.3390/atmos12020150
- Rixen, C., Hoyer, T., **Welker, J. M.**, et al. (2022) Winters are changing: snow effects on Arctic and alpine tundra ecosystems. *Arctic Science*. doi.org/10.1139/as-2020-0041
- 80 Pedron, S., Jespersen, R. G., Xu, X., Khazindar, Y., **Welker, J. M.**, & Czimeczik, C. (2023) More snow accelerates legacy carbon emissions from Arctic permafrost. *AGU Advances*. doi.org/10.1029/2023AV000942
- Kantola, N., **Welker, J. M.**, Leffler, A. J., et al. (2025) Impacts of winter climate change on northern forest understory carbon dioxide exchange determined by reindeer grazing. *Science of the Total Environment*. doi.org/10.1016/j.scitotenv.2025.180089

## Response

- 85 [We agree and have incorporated the cited literature into the discussion. Several of these studies directly inform interpretation of our winter CO<sub>2</sub> flux magnitudes, snow depth controls, and the role of winter processes in annual carbon budgets.](#)

### *Revised manuscript text (Discussion)*

- 90 *Measured winter CO<sub>2</sub> flux magnitudes at TVC are consistent with early observations from Arctic Alaska showing sustained cold-season emissions under snow cover (Fahnestock et al., 1998, 1999; Jones et al., 1999b; Welker et al., 2000). Subsequent work has demonstrated that snow depth, thermal insulation, and active-layer dynamics exert strong controls on winter respiration and the age of respired carbon (Lupascu et al., 2018; Pedron et al., 2023; Schimel et al., 2006; Sullivan et al., 2008). Measurements at TVC extend these findings by resolving fine-scale spatial variability in winter fluxes and by evaluating how simplified sampling strategies capture this variability under dry snowpack conditions.*

95

## References

- 100 Fahnestock, J. T., Jones, M. H., Brooks, P. D., Walker, D. A., and Welker, J. M.: Winter and early spring CO<sub>2</sub> efflux from tundra communities of northern Alaska, *J. Geophys. Res. Atmospheres*, 103, 29023–29027, <https://doi.org/10.1029/98JD00805>, 1998.
- Fahnestock, J. T., Jones, M. H., and Welker, J. M.: Wintertime CO<sub>2</sub> efflux from Arctic soils: Implications for annual carbon budgets, *Glob. Biogeochem. Cycles*, 13, 775–779, <https://doi.org/10.1029/1999GB900006>, 1999.
- 105 Jones, H. G., Pomeroy, J. W., Davies, T. D., Tranter, M., and Marsh, P.: CO in Arctic snow cover: landscape form, in-pack gas concentration gradients, and the implications for the estimation of gaseous fluxes, *Hydrol. Process.*, 13, 2977–2989, [https://doi.org/10.1002/\(SICI\)1099-1085\(19991230\)13:18%3C2977::AID-HYP12%3E3.0.CO;2-%23](https://doi.org/10.1002/(SICI)1099-1085(19991230)13:18%3C2977::AID-HYP12%3E3.0.CO;2-%23), 1999a.
- Jones, M. H., Fahnestock, J. T., and Welker, J. M.: Early and Late Winter CO<sub>2</sub> Efflux from Arctic Tundra in the Kuparuk River Watershed, Alaska, U.S.A., *Arct. Antarct. Alp. Res.*, 31, 187–190, <https://doi.org/10.1080/15230430.1999.12003296>, 1999b.
- 110 Lupascu, M., Czimczik, C. I., Welker, M. C., Ziolkowski, L. A., Cooper, E. J., and Welker, J. M.: Winter Ecosystem Respiration and Sources of CO<sub>2</sub> From the High Arctic Tundra of Svalbard: Response to a Deeper Snow Experiment, *J. Geophys. Res. Biogeosciences*, 123, 2627–2642, <https://doi.org/10.1029/2018JG004396>, 2018.
- Mavrovic, A., Sonnentag, O., Lemmetyinen, J., Voigt, C., Rutter, N., Mann, P., Sylvain, J.-D., and Roy, A.: Environmental controls of winter soil carbon dioxide fluxes in boreal and tundra environments, *Biogeosciences*, 20, 5087–5108, <https://doi.org/10.5194/bg-20-5087-2023>, 2023.
- 115 Natali, S. M., Watts, J. D., Rogers, B. M., Potter, S., Ludwig, S. M., Selbmann, A. K., Sullivan, P. F., Abbott, B. W., Arndt, K. A., Birch, L., Björkman, M. P., Bloom, A. A., Celis, G., Christensen, T. R., Christiansen, C. T., Commane, R., Cooper, E. J., Crill, P., Czimczik, C., Davydov, S., Du, J., Egan, J. E., Elberling, B., Euskirchen, E. S., Friborg, T., Genet, H., Göckede, M., Goodrich, J. P., Grogan, P., Helbig, M., Jafarov, E. E., Jastrow, J. D., Kalhori, A. A. M., Kim, Y., Kimball, J. S., Kutzbach, L., Lara, M. J., Larsen, K. S., Lee, B. Y., Liu, Z., Lorant, M. M., Lund, M., Lupascu, M., Madani, N., Malhotra, A., Matamala, R., McFarland, J., McGuire, A. D., Michelsen, A., Minions, C., Oechel, W. C., Olefeldt, D., Parmentier, F. J. W., Pirk, N., Poulter, B., Quinton, W., Rezanezhad, F., Risk, D., Sachs, T., Schaefer, K., Schmidt, N. M., Schuur, E. A. G., Semenchuk, P. R., Shaver, G., Sonnentag, O., Starr, G., Treat, C. C., Waldrop, M. P., Wang, Y., Welker, J., Wille, C., Xu, X., Zhang, Z., Zhuang, Q., and Zona, D.: Large loss of CO<sub>2</sub> in winter observed across the northern permafrost region, *Nat. Clim. Change*, 9, 852–857, <https://doi.org/10.1038/s41558-019-0592-8>, 2019.
- 120 Pedron, S. A., Jespersen, R. G., Xu, X., Khazindar, Y., Welker, J. M., and Czimczik, C. I.: More Snow Accelerates Legacy Carbon Emissions From Arctic Permafrost, *AGU Adv.*, 4, e2023AV000942, <https://doi.org/10.1029/2023AV000942>, 2023.
- Pirk, N., Tamstorf, M. P., Lund, M., Mastepanov, M., Pedersen, S. H., Mylius, M. R., Parmentier, F.-J. W., Christiansen, H. H., and Christensen, T. R.: Snowpack fluxes of methane and carbon dioxide from high Arctic tundra, *J. Geophys. Res. Biogeosciences*, 121, 2886–2900, <https://doi.org/10.1002/2016JG003486>, 2016.
- 130 Rafat, A., Rezanezhad, F., Quinton, W. L., Humphreys, E. R., Webster, K., and Van Cappellen, P.: Non-growing season carbon emissions in a northern peatland are projected to increase under global warming, *Commun. Earth Environ.*, 2, <https://doi.org/10.1038/s43247-021-00184-w>, 2021.
- Schimel, J. P., Fahnestock, J., Michaelson, G., Mikan, C., Ping, C.-L., Romanovsky, V. E., and Welker, J.: Cold-season Production of CO<sub>2</sub> in Arctic Soils: Can Laboratory and Field Estimates Be Reconciled through a Simple Modeling Approach?,

- 135 Arct. Antarct. Alp. Res., 38, 249–256, [https://doi.org/10.1657/1523-0430\(2006\)38%255B249:CPOCIA%255D2.0.CO;2](https://doi.org/10.1657/1523-0430(2006)38%255B249:CPOCIA%255D2.0.CO;2), 2006.
- Seok, B., Helmig, D., Williams, M. W., Liptzin, D., Chowanski, K., and Hueber, J.: An automated system for continuous measurements of trace gas fluxes through snow: an evaluation of the gas diffusion method at a subalpine forest site, Niwot Ridge, Colorado, *Biogeochemistry*, 95, 95–113, <https://doi.org/10.1007/s10533-009-9302-3>, 2009.
- 140 Sullivan, P. F., Welker, J. M., Arens, S. J. T., and Sveinbjörnsson, B.: Continuous estimates of CO<sub>2</sub> efflux from arctic and boreal soils during the snow-covered season in Alaska, *J. Geophys. Res. Biogeosciences*, 113, <https://doi.org/10.1029/2008JG000715>, 2008.
- Welker, J. M., Fahnestock, J. T., and Jones, M. H.: Annual CO<sub>2</sub> Flux in Dry and Moist Arctic Tundra: Field Responses to Increases in Summer Temperatures and Winter Snow Depth, *Clim. Change*, 44, 139–150, 145 <https://doi.org/10.1023/A:1005555012742>, 2000.
- Zhu, C., Nakayama, M., and Yoshikawa Inoue, H.: Continuous measurement of CO<sub>2</sub> flux through the snowpack in a dwarf bamboo ecosystem on Rishiri Island, Hokkaido, Japan, *Polar Sci.*, 8, 218–231, <https://doi.org/10.1016/j.polar.2014.04.003>, 2014.
- Zona, D., Gioli, B., Commane, R., Lindaas, J., Wofsy, S. C., Miller, C. E., Dinardo, S. J., Dengel, S., Sweeney, C., Karion, 150 A., Chang, R. Y.-W., Henderson, J. M., Murphy, P. C., Goodrich, J. P., Moreaux, V., Liljedahl, A., Watts, J. D., Kimball, J. S., Lipson, D. A., and Oechel, W. C.: Cold season emissions dominate the Arctic tundra methane budget., *Proc. Natl. Acad. Sci. U. S. A.*, 113, 40–5, <https://doi.org/10.1073/pnas.1516017113>, 2016.
